# Supplementary material for: A membrane-based, high-efficiency, microfluidic debubbler
Source: Royal Society of Chemistry journal article supplement (doi:10.1039/c1lc20089e), 2011-01-01
Supplement: c1lc20089e.pdf [file c1lc20089e.pdf]

Supplementary Material (ESI) for Lab on a Chip  
This journal is © The Royal Society of Chemistry 2011

# **A membrane-based, high-efficiency, microfluidic debubbler – Supplemental Information**

Changchun Liu, Jason A. Thompson, and Haim H. Bau \*

Department of Mechanical Engineering and Applied Mechanics  
University of Pennsylvania, PA 19104-6315

**\* Corresponding author**

Professor Haim H. Bau

Department of Mechanical Engineering and Applied Mechanics

University of Pennsylvania

229 Towne Building

220 S. 33<sup>rd</sup> St.

Philadelphia, Pennsylvania 19104-6315, USA

Fax: (215) 573-6334, Phone: (215) 898-8363

E-mail: [bau@seas.upenn.edu](mailto:bau@seas.upenn.edu)

Movie S1: A video showing the debubbler removing an airbubble from a stream of DI water.

Movie S2: A video showing the debubbler removing an airbubble from a stream of PBS buffer.

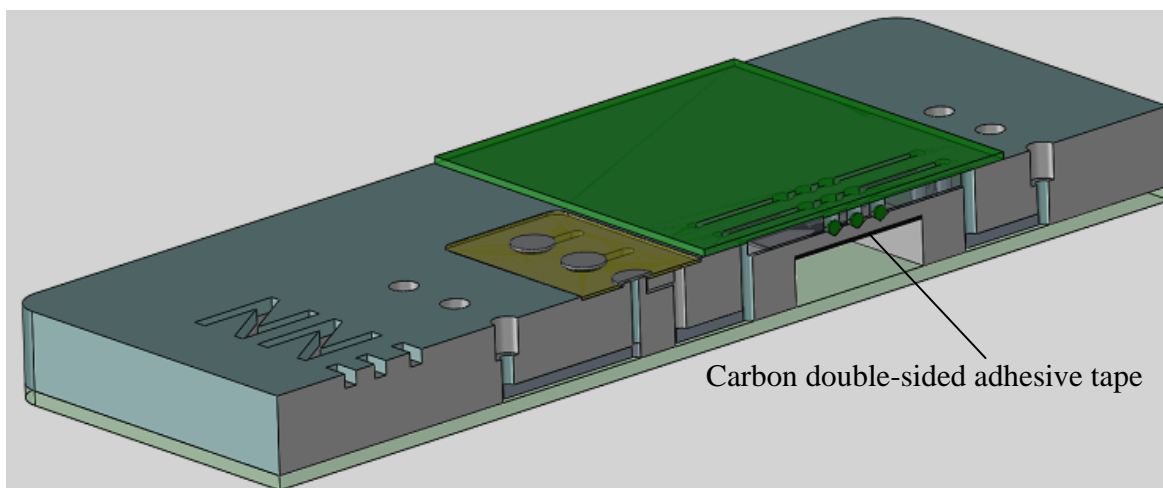

**Fig. S1:** Cross-sectional view of the assembled microfluidic cassette.

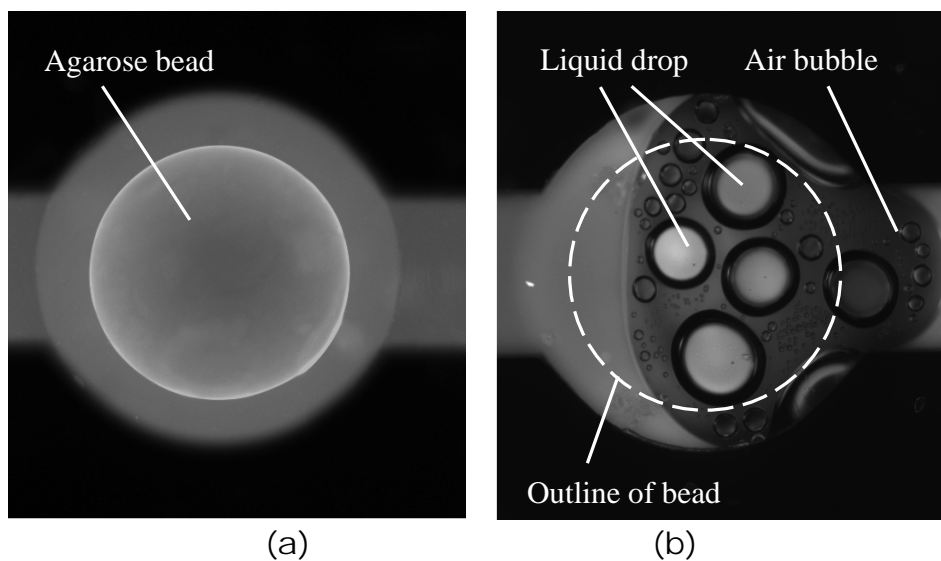

**Fig. S2:** (a) Fluorescent image of an agarose bead in a microfluidic cassette integrated with a debubbler. No observable air bubble was trapped in the bead well. (b) Fluorescent image of an agarose bead in a microfluidic cassette without a debubbler. Air bubbles trapped in the bead well disturb DNA detection and subsequent fluorescent imaging. In contrast to the degassed case (a), the bead (outlined with a dashed line) is barely visible.

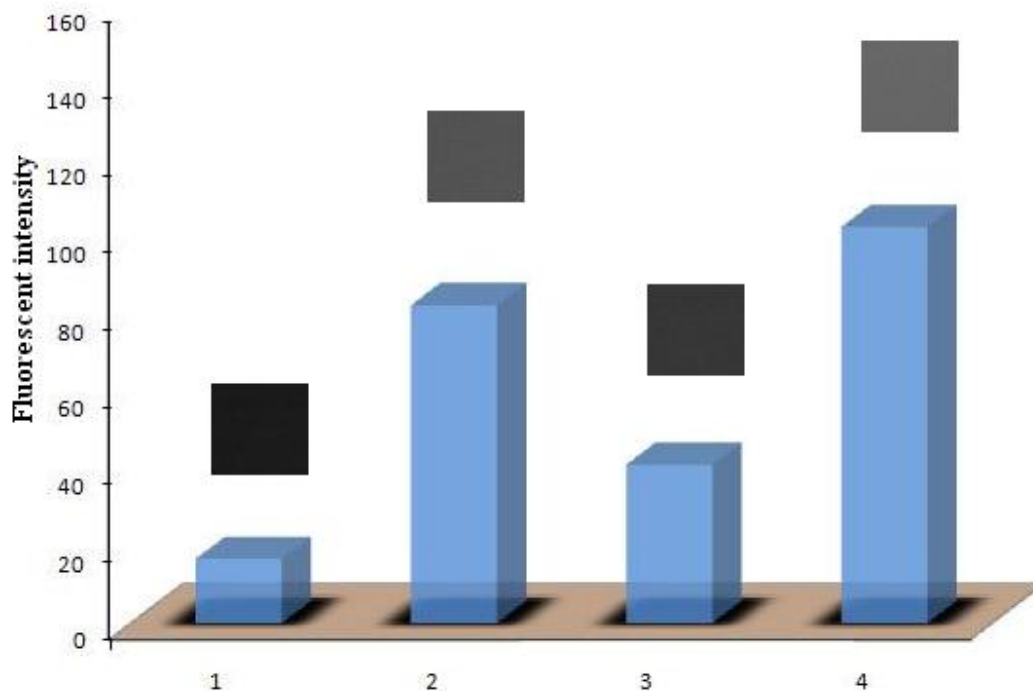

**Fig. S3:** Background fluorescent intensity as a function of the substrate material. (1) 0.8 mm-thick PMMA substrate with black tape; (2) 0.8 mm-thick PMMA substrate without tape; (3) 3 mm-thick PMMA substrate with black tape; and (4) 3 mm-thick PMMA substrate without tape. The photograph above the top of each column is a fluorescent image of the corresponding substrate material.

**Fig. S3** depicts the background fluorescent intensity (in arbitrary units) as a function of the thickness of the PMMA substrate in the absence and presence of a carbon tape. The figure demonstrates that the background fluorescence can be dramatically decreased by reducing the PMMA substrate thickness and by attaching a carbon black tape to the back of the substrate. The squares above the bars in the figure are samples of the signal detected with the camera at each case.

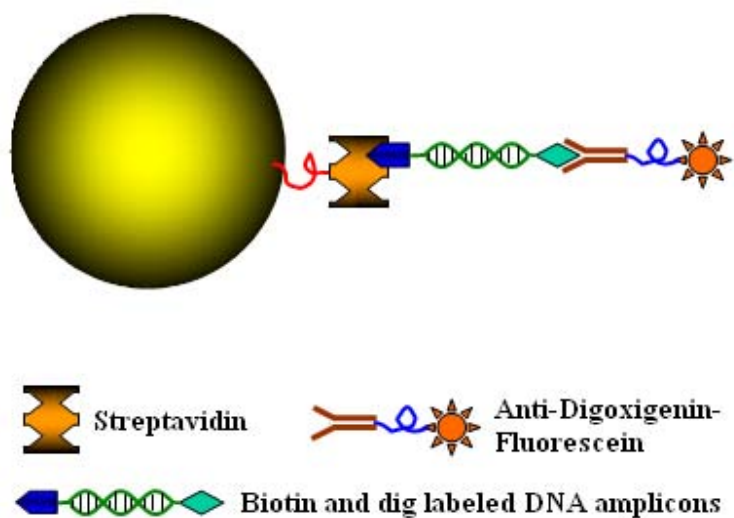

**Fig. S4** A schematic depiction of the streptavidin-coated agarose bead-based assay. Biotin and dig labeled DNA amplicon first bind to the streptavidin-coated agarose bead through their biotin functionalization. Then, the anti-digoxigenin-fluorescein complex binds to the dig end of the DNA amplicon.
